# Supplementary material for: Therapeutic efficacy, pharmacokinetic profiles, and toxicological activities of humanized antibody-drug conjugate Zt/g4-MMAE targeting RON receptor tyrosine kinase for cancer therapy
Source: PubMed Central journal article supplement (PMC6419354; doi:10.1186/s40425-019-0525-0), 2019-03-14
Supplement: 40425_2019_525_MOESM2_ESM.pdf [file 40425_2019_525_MOESM2_ESM.pdf]

**Supplementary Table 1 Pathological and Biological Features of Primary PDAC Cell Lines from Patient-Derived Xenograft Tumors\***

| PDAC Cell lines  | Patient age & gender | Tumor size & stage | Lymphatic invasion | Morphology of cell lines | Doubling time (h) | RON expression | Endocytosis of RON (EC <sub>50</sub> = h) | Sensitivity to ADC (μg/ml) | Growth in athymic mice |
|------------------|----------------------|--------------------|--------------------|--------------------------|-------------------|----------------|-------------------------------------------|----------------------------|------------------------|
| <b>AMC-01</b>    | 66 & M               | 3.5 & IIA          | Yes                | epithelial-like          | 68                | ++++           | Not done                                  | 2.13 ± 0.25                | Not observed           |
| <b>AMC-02</b>    | 30 & M               | 2.1 & IIA          | No                 | epithelial-like          | 87                | ++++           | 14.3 ± 0.76                               | 1.98 ± 0.33                | Able to grow           |
| <b>AMC-04</b>    | 53 & M               | 3.1 & IIB          | No                 | mesenchymal-like         | 48                | ++             | 15.2 ± 0.54                               | 5.88 ± 1.14                | Able to grow           |
| <b>AMC-05</b>    | 70 & M               | 5.7 & IIA          | Yes                | epithelial-like          | 75                | +++            | ND                                        | 2.81 ± 0.78                | Not done               |
| <b>PDC110621</b> | 66 & M               | 3.5 & IIA          | Yes                | epithelial-like          | ND                | ++             | 31.28 ± 0.47                              | 3.51 ± 0.44                | Able to grow           |
| <b>PDC115026</b> | 70 & M               | 5.7 & IIB          | Yes                | epithelial-like          | ND                | +++            | 36.78 ± 0.32                              | 8.42 ± 1.12                | Not done               |
| <b>SNU2491</b>   | 61 & F               | 2.5 & IIB          | Yes                | epithelial-like          | 64                | +++            | 20.25 ± 0.35                              | 1.75 ± 0.40                | Able to grow           |
| <b>SNU410</b>    | 53 & M               | NA & V             | No                 | mesenchymal-like         | 72                | +              | Not observed                              | 10.31 ± 1.87               | Able to grow           |

\*Primary cell lines from PDXs of PDAC patients were generated and characterized as detailed in a previous report (Jung et al., 2016). Levels of RON expression by individual cell lines were determined using immunofluorescence and Western blot analyses. H-Zt/g4 was used as the primary antibody. H-Zt/g4-induced RON endocytosis was performed using the method detailed in Experimental Procedures. Sensitivity of individual cell lines to H-Zt/g4-MMAE-induced reduction in cell viability was performed using the MTS assay as described previously [31]. Individual cell lines having capable of growing in athymic nude mice were selected for *in vivo* H-Zt/g4-MMAE therapeutic study.

**Supplementary Table 2 Adverse Effects of H-Zt/g4-MMAE on blood leukocyte and erythrocytes in Cynomolgus monkey**

| Measurement of blood cells             | Treatment with ADC | Dynamic changes of leukocytes and erythrocytes after H-Zt/g4-MMAE injection (days, Mean $\pm$ SD) |                  |                  |                 |                   |                   |                  |
|----------------------------------------|--------------------|---------------------------------------------------------------------------------------------------|------------------|------------------|-----------------|-------------------|-------------------|------------------|
|                                        |                    | 0                                                                                                 | 2                | 4                | 8               | 15                | 22                | 29               |
| Total leukocytes ( $10^9$ /liter)      | Control            | 10.37 $\pm$                                                                                       | 13.35 $\pm$      | 12.94 $\pm$      | 12.35 $\pm$     | 14.33 $\pm$       | 12.12 $\pm$       | 13.15 $\pm$      |
|                                        | 10 mg/kg           | 12.29 $\pm$ 3.30                                                                                  | 12.98 $\pm$ 6.16 | 11.47 $\pm$ 5.48 | 7.77 $\pm$ 4.64 | 14.23 $\pm$ 4.80  | 24.00 $\pm$ 12.63 | 12.62 $\pm$ 8.21 |
|                                        | 30 mg/kg           | 13.15 $\pm$ 6.82                                                                                  | 11.90 $\pm$ 2.18 | 12.11 $\pm$ 2.05 | 2.21 $\pm$ 0.57 | 34.11 $\pm$ 12.90 | 16.68 $\pm$ 5.68  | 11.71 $\pm$ 0.85 |
| Total neutrophils ( $10^9$ /liter)     | Control            | 3.93 $\pm$                                                                                        | 10.88 $\pm$      | 4.27 $\pm$       | 4.70 $\pm$      | 5.24 $\pm$        | 3.71 $\pm$        | 4.68 $\pm$       |
|                                        | 10 mg/kg           | 5.77 $\pm$ 2.64                                                                                   | 5.12 $\pm$ 1.97  | 3.70 $\pm$ 1.14  | 1.50 $\pm$ 0.86 | 2.18 $\pm$ 2.69   | 11.70 $\pm$ 5.53  | 7.85 $\pm$ 2.81  |
|                                        | 30 mg/kg           | 7.34 $\pm$ 6.70                                                                                   | 6.58 $\pm$ 2.07  | 7.89 $\pm$ 2.14  | 0.04 $\pm$ 0.03 | 28.18 $\pm$ 4.65  | 8.03 $\pm$ 3.63   | 7.08 $\pm$ 0.13  |
| Total lymphocytes ( $10^9$ /liter)     | Control            | 5.60 $\pm$                                                                                        | 5.43 $\pm$       | 7.83 $\pm$       | 6.67 $\pm$      | 7.90 $\pm$        | 7.18 $\pm$        | 7.31 $\pm$       |
|                                        | 10 mg/kg           | 6.32 $\pm$ 3.98                                                                                   | 7.12 $\pm$ 3.83  | 7.25 $\pm$ 4.79  | 5.79 $\pm$ 3.75 | 10.19 $\pm$ 3.83  | 10.83 $\pm$ 6.57  | 7.92 $\pm$ 4.99  |
|                                        | 30 mg/kg           | 6.20 $\pm$ 1.07                                                                                   | 4.55 $\pm$ 1.71  | 3.79 $\pm$ 0.88  | 2.08 $\pm$ 0.57 | 14.32 $\pm$ 4.23  | 7.42 $\pm$ 1.76   | 7.45 $\pm$ 1.23  |
| Total monocytes ( $10^9$ /liter)       | Control            | 0.87 $\pm$                                                                                        | 0.81 $\pm$       | 0.74 $\pm$       | 0.91 $\pm$      | 1.07 $\pm$        | 1.10 $\pm$        | 0.93 $\pm$       |
|                                        | 10 mg/kg           | 0.73 $\pm$ 0.27                                                                                   | 0.66 $\pm$ 0.39  | 0.41 $\pm$ 0.27  | 0.36 $\pm$ 0.15 | 2.01 $\pm$ 2.35   | 1.41 $\pm$ 1.53   | 0.61 $\pm$ 0.35  |
|                                        | 30 mg/kg           | 0.75 $\pm$ 0.08                                                                                   | 0.78 $\pm$ 0.32  | 0.32 $\pm$ 0.14  | 0.08 $\pm$ 0.03 | 7.96 $\pm$ 4.72   | 1.20 $\pm$ 0.48   | 0.82 $\pm$ 0.36  |
| Neutrophil (%)                         | Control            | 36.9 $\pm$                                                                                        | 38.1 $\pm$       | 33.5 $\pm$       | 37.1 $\pm$      | 36.6 $\pm$        | 34.4 $\pm$        | 35.9 $\pm$       |
|                                        | 10 mg/kg           | 47.4 $\pm$ 28.2                                                                                   | 40.9 $\pm$ 4.7   | 37.3 $\pm$ 21.7  | 22.0 $\pm$ 10.4 | 20.5 $\pm$ 25.7   | 52.4 $\pm$ 16.2   | 40.8 $\pm$ 7.7   |
|                                        | 30 mg/kg           | 49.1 $\pm$ 20.1                                                                                   | 55.1 $\pm$ 12.4  | 34.6 $\pm$ 8.2   | 2.0 $\pm$ 1.6   | 62.5 $\pm$ 21.8   | 46.9 $\pm$ 5.7    | 52.4 $\pm$ 0.4   |
| Lymphocyte (%)                         | Control            | 55.3 $\pm$                                                                                        | 53.0 $\pm$       | 60.0 $\pm$       | 54.8 $\pm$      | 55.1 $\pm$        | 59.4 $\pm$        | 55.7 $\pm$       |
|                                        | 10 mg/kg           | 49.4 $\pm$ 25.8                                                                                   | 54.6 $\pm$ 3.8   | 58.6 $\pm$ 20.1  | 71.2 $\pm$ 11.9 | 71.5 $\pm$ 17.2   | 42.8 $\pm$ 14.2   | 62.6 $\pm$ 7.0   |
|                                        | 30 mg/kg           | 45.3 $\pm$ 17.9                                                                                   | 37.6 $\pm$ 12.2  | 31.9 $\pm$ 9.0   | 94.1 $\pm$ 2.5  | 66.5 $\pm$ 5.3    | 55.7 $\pm$ 6.6    | 63.3 $\pm$ 6.4   |
| Monocyte (%)                           | Control            | 7.2 $\pm$                                                                                         | 6.8 $\pm$        | 7.1 $\pm$        | 7.6 $\pm$       | 7.4 $\pm$         | 8.2 $\pm$         | 6.8 $\pm$        |
|                                        | 10 mg/kg           | 3.0 $\pm$ 2.4                                                                                     | 5.0 $\pm$ 2.3    | 3.4 $\pm$ 1.1    | 5.1 $\pm$ 1.1   | 11.8 $\pm$ 10.6   | 4.6 $\pm$ 3.8     | 5.0 $\pm$ 1.7    |
|                                        | 30 mg/kg           | 4.2 $\pm$ 1.4                                                                                     | 6.4 $\pm$ 1.7    | 2.6 $\pm$ 0.6    | 3.8 $\pm$ 1.3   | 14.6 $\pm$ 9.1    | 7.2 $\pm$ 2.3     | 7.1 $\pm$ 3.6    |
| Total erythrocytes ( $10^{12}$ /liter) | Control            | 5.44 $\pm$                                                                                        | 4.83 $\pm$       | 4.69 $\pm$       | 4.68 $\pm$      | 4.98 $\pm$        | 5.03 $\pm$        | 5.24 $\pm$       |
|                                        | 10 mg/kg           | 5.58 $\pm$ 0.34                                                                                   | 5.03 $\pm$ 0.25  | 4.72 $\pm$ 0.30  | 4.21 $\pm$ 0.26 | 5.04 $\pm$ 0.06   | 5.06 $\pm$ 0.07   | 4.96 $\pm$ 0.16  |
|                                        | 30 mg/kg           | 5.34 $\pm$ 0.56                                                                                   | 4.93 $\pm$ 0.38  | 4.64 $\pm$ 0.6   | 3.95 $\pm$ 0.26 | 3.59 $\pm$ 0.08   | 4.00 $\pm$ 0.12   | 4.73 $\pm$ 0.22  |
| Total reticulocytes ( $10^9$ /liter)   | Control            | 61.7 $\pm$                                                                                        | 55.7 $\pm$       | 63.5 $\pm$       | 67.2 $\pm$      | 72.0 $\pm$        | 63.0 $\pm$        | 71.1 $\pm$       |
|                                        | 10 mg/kg           | 72.8 $\pm$ 12.6                                                                                   | 66.5 $\pm$ 22.2  | 65.0 $\pm$ 28.5  | 42.0 $\pm$ 10.3 | 379.3 $\pm$ 165.6 | 147.0 $\pm$ 66.0  | 145.7 $\pm$ 50.6 |
|                                        | 30 mg/kg           | 59.6 $\pm$ 6.9                                                                                    | 51.1 $\pm$ 11.8  | 23.5 $\pm$ 7.5   | 28.7 $\pm$ 12.0 | 146.1 $\pm$ 31.1  | 289.0 $\pm$ 102.3 | 130.8 $\pm$ 61.7 |

**Supplementary Table 3 Effect of H-Zt/g4-MMAE *in vivo* on various enzymatic activities in blood samples collected from cynomolgus monkeys**

| Measurement of Blood Cells                           | Treatment with ADC | Dynamic changes of blood Enzymatic levels after H-Zt/g4-MMAE injection (days, Mean $\pm$ SD) |                |                 |                 |                 |               |               | Clinical implications         |
|------------------------------------------------------|--------------------|----------------------------------------------------------------------------------------------|----------------|-----------------|-----------------|-----------------|---------------|---------------|-------------------------------|
|                                                      |                    | 0                                                                                            | 2              | 4               | 8               | 15              | 22            | 29            |                               |
| Alanine transaminase (ALT, Unit/L)                   | Control            | 42 $\pm$                                                                                     | 43 $\pm$       | 44 $\pm$        | 63 $\pm$        | 52 $\pm$        | 38 $\pm$      | 40 $\pm$      | Liver damage                  |
|                                                      | 10 mg/kg           | 57 $\pm$ 19                                                                                  | 110 $\pm$ 39   | 127 $\pm$ 34    | 86 $\pm$ 25     | 56 $\pm$ 13     | 57 $\pm$ 8    | 53 $\pm$ 18   |                               |
|                                                      | 30 mg/kg           | 45 $\pm$ 22                                                                                  | 79 $\pm$ 40    | 122 $\pm$ 67    | 95 $\pm$ 35     | 40 $\pm$ 11     | 34 $\pm$ 9    | 34 $\pm$ 11   |                               |
| Alkaline phosphatase (ALP, Unit/L)                   | Control            | 297 $\pm$                                                                                    | 357 $\pm$      | 367 $\pm$       | 456 $\pm$       | 428 $\pm$       | 362 $\pm$     | 392 $\pm$     | Liver damage or bone disorder |
|                                                      | 10 mg/kg           | 413 $\pm$ 53                                                                                 | 353 $\pm$ 37   | 384 $\pm$ 46    | 510 $\pm$ 22    | 517 $\pm$ 15    | 462 $\pm$ 49  | 429 $\pm$ 31  |                               |
|                                                      | 30 mg/kg           | 352 $\pm$ 129                                                                                | 311 $\pm$ 96   | 339 $\pm$ 117   | 486 $\pm$ 224   | 629 $\pm$ 357   | 428 $\pm$ 159 | 444 $\pm$ 174 |                               |
| Aspartate transaminase (AST, Unit/L)                 | Control            | 55 $\pm$                                                                                     | 62 $\pm$       | 88 $\pm$        | 69 $\pm$        | 41 $\pm$        | 38 $\pm$      | 42 $\pm$      | Liver or heart damage         |
|                                                      | 10 mg/kg           | 46 $\pm$ 9                                                                                   | 135 $\pm$ 65   | 96 $\pm$ 10     | 75 $\pm$ 12     | 53 $\pm$ 3      | 49 $\pm$ 8    | 42 $\pm$ 7    |                               |
|                                                      | 30 mg/kg           | 58 $\pm$ 31                                                                                  | 255 $\pm$ 125  | 394 $\pm$ 254   | 171 $\pm$ 98    | 64 $\pm$ 8      | 51 $\pm$ 8    | 50 $\pm$ 12   |                               |
| Gamma-glutamine transaminase ( $\gamma$ -GT, Unit/L) | Control            | 54 $\pm$                                                                                     | 39 $\pm$       | 38 $\pm$        | 42 $\pm$        | 44 $\pm$        | 40 $\pm$      | 44 $\pm$      | Liver damage                  |
|                                                      | 10 mg/kg           | 52 $\pm$ 9                                                                                   | 50 $\pm$ 14    | 49 $\pm$ 16     | 49 $\pm$ 15     | 48 $\pm$ 17     | 51 $\pm$ 15   | 52 $\pm$ 17   |                               |
|                                                      | 30 mg/kg           | 44 $\pm$ 18                                                                                  | 42 $\pm$ 18    | 40 $\pm$ 19     | 35 $\pm$ 6      | 44 $\pm$ 17     | 43 $\pm$ 19   | 41 $\pm$ 18   |                               |
| Lactate dehydrogenase (LDH, Unit/L)                  | Control            | 342 $\pm$                                                                                    | 312 $\pm$      | 335 $\pm$       | 425 $\pm$       | 414 $\pm$       | 297 $\pm$     | 350 $\pm$     | Various tissue damage         |
|                                                      | 10 mg/kg           | 338 $\pm$ 85                                                                                 | 875 $\pm$ 159  | 745 $\pm$ 184   | 801 $\pm$ 290   | 700 $\pm$ 122   | 373 $\pm$ 30  | 349 $\pm$ 104 |                               |
|                                                      | 30 mg/kg           | 412 $\pm$ 27                                                                                 | 1360 $\pm$ 396 | 1,694 $\pm$ 820 | 1,073 $\pm$ 206 | 1,364 $\pm$ 543 | 727 $\pm$ 294 | 534 $\pm$ 170 |                               |
| Creatine kinase (CPK, Unit/L)                        | Control            | 171 $\pm$                                                                                    | 156 $\pm$      | 148 $\pm$       | 151 $\pm$       | 171 $\pm$       | 169 $\pm$     | 176 $\pm$     | Muscle damage                 |
|                                                      | 10 mg/kg           | 167 $\pm$ 27                                                                                 | 656 $\pm$ 366  | 1,413 $\pm$ 180 | 268 $\pm$ 35    | 238 $\pm$ 29    | 198 $\pm$ 18  | 174 $\pm$ 15  |                               |
|                                                      | 30 mg/kg           | 183 $\pm$ 39                                                                                 | 530 $\pm$ 306  | 7,734 $\pm$ 562 | 861 $\pm$ 565   | 208 $\pm$ 102   | 169 $\pm$ 21  | 186 $\pm$ 35  |                               |
